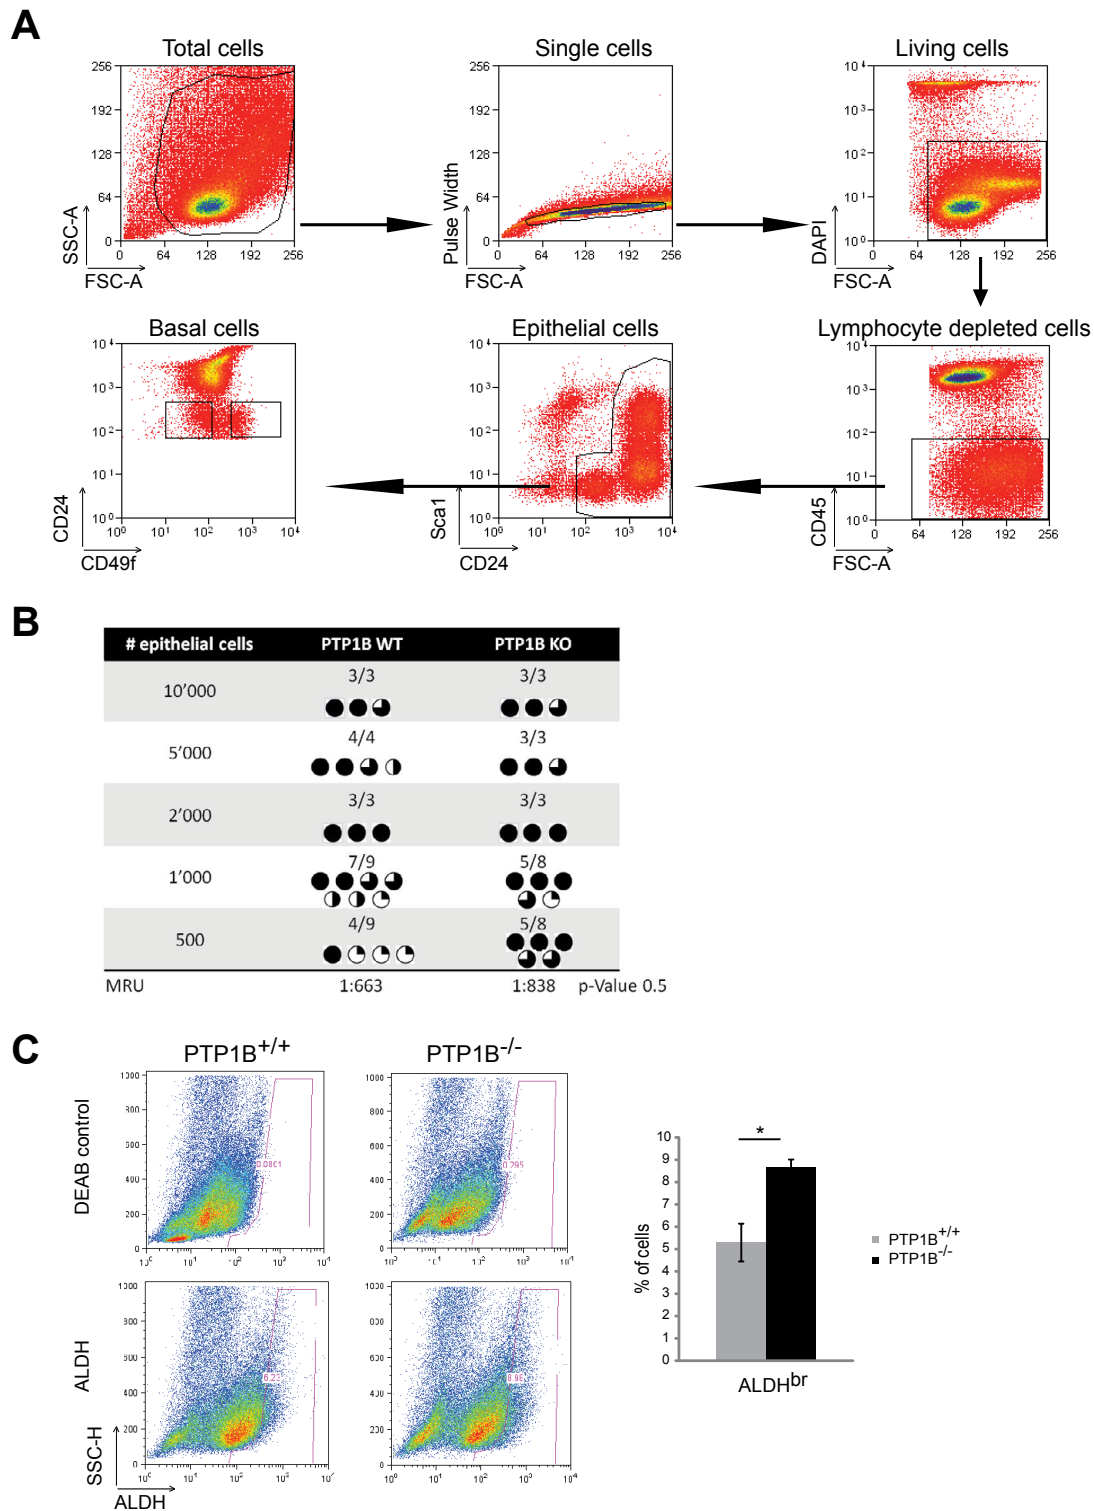

**Fig. S1. PTP1B depletion increases ALDH activity in mammary epithelial cells.** (A) Representative flow cytometry dot plots showing the gating strategy used to isolate mammary epithelial cell subpopulations. Cells were first gated on the basis of forward and side scatters (FSC-A and SSC-A), followed by the exclusion of doublets and higher-order cell clumps using a time-of-flight approach (pulse width). Dead cells were then gated out by DAPI staining, followed by the exclusion of leukocytes by CD45 staining. Finally, total epithelial cells were isolated based on their CD24 and Sca1 expression. Further isolation of MaSCs and myoepithelial cells was performed based on the expression of CD24 and CD49f. (B) Mammary repopulating activity of *Ptp1b*<sup>+/+</sup> and *Ptp1b*<sup>-/-</sup> MECs. 10,000, 5000, 2000, 1000 and 500 freshly isolated mammary epithelial cells (MECs) from *Ptp1b*<sup>-/-</sup> and *Ptp1b*<sup>+/+</sup> glands in estrus were injected into the cleared fat pad of FVB mice. The repopulation of the fat pad was scored 7 weeks after transplantation. The transplantation frequency analysis was performed using R and the statmod package as previously described (Shackleton et al., 2006). (C) (Left) Dot plot pattern of ALDH-positive cells showing an increase in ALDH activity in *Ptp1b*<sup>-/-</sup> MECs. (Right) The percentages of cells with high ALDH activity (ALDH<sup>br</sup>) from *Ptp1b*<sup>+/+</sup> and *Ptp1b*<sup>-/-</sup> nulliparous mice at estrus. Values represent mean  $\pm$  s.e.m. ( $n=3$ ,  $*P<0.05$  by Student's *t*-test).

**A**

| Cell cycle genes upregulated in PTP1B -/- |              |                                            |              |         |             |
|-------------------------------------------|--------------|--------------------------------------------|--------------|---------|-------------|
| Accession #                               | Symbol       | description                                | fold changes | p-value | Adj p-value |
| NM_009828                                 | CCNA2        | cyclin A2                                  | 2.46         | 0.0115  | 0.1768713   |
| NM_011623                                 | Topo2        | topoisomerase (DNA) II alpha               | 2.30         | 0.0078  | 0.1592963   |
| NM_007630                                 | CCNB2        | cyclin B2                                  | 2.14         | 0.0144  | 0.1916421   |
| NM_011121                                 | Plk1         | polo-like kinase 1 (Drosophila)            | 2.14         | 0.0126  | 0.1836071   |
| NM_007659                                 | Cdc2a (CDK1) | cell division cycle 2 homolog A (S. pombe) | 2.00         | 0.0104  | 0.1712105   |
| NM_007691                                 | Chek1        | checkpoint kinase 1 homolog (S. pombe)     | 1.87         | 0.0244  | 0.2270902   |
| NM_018754                                 | SFN          | stratifin                                  | 1.62         | 0.0005  | 0.062044    |
| NM_001081117                              | Mki67        | antigen identified by monoclonal Ab Ki 67  | 1.84         | 0.0418  | 0.2758198   |
| NM_025415                                 | CKS2         | CDC28 protein kinase regulatory subunit 2  | 1.48         | 0.0403  | 0.272589    |

  

| estrogen-responsive genes upregulated in PTP1B -/- |             |                                            |              |          |             |
|----------------------------------------------------|-------------|--------------------------------------------|--------------|----------|-------------|
| Accession #                                        | Symbol      | description                                | fold changes | p-value  | Adj p-value |
| NM_010118                                          | Egr2        | early growth response 2                    | 3.00         | 2.28E-06 | 0.0039558   |
| NM_009704                                          | Areg        | amphiregulin                               | 2.88         | 9.55E-09 | 0.0003318   |
| NM_007969                                          | Expi        | extracellular proteinase inhibitor         | 1.98         | 0.001761 | 0.0959992   |
| NM_001081249                                       | Vcan(cspg2) | vesican                                    | 1.94         | 0.001344 | 0.0889354   |
| NM_010848                                          | c-myb       | myeloblastosis oncogene                    | 1.93         | 3.95E-05 | 0.0176528   |
| NM_008829                                          | Pgr         | Progesterone receptor                      | 1.80         | 0.005725 | 0.1446963   |
| NM_010849                                          | c-myc       | myelocytomatosis oncogene                  | 1.59         | 0.002251 | 0.1048908   |
| NM_011961                                          | Plod2       | procollagen lysine, 2-oxoglutarate 5-dioxy | 1.57         | 0.005868 | 0.1450678   |
| NM_010233                                          | FN1         | fibronectin 1                              | 1.51         | 0.006227 | 0.1474954   |
| NM_013650                                          | S100A8      | S100 calcium binding protein A8 (calgranul | 1.46         | 0.009963 | 0.1695082   |
| NM_033073                                          | Krt7        | keratin 7                                  | 1.43         | 0.007621 | 0.1586751   |
| NM_019521                                          | Gas6        | growth arrest specific 6                   | 1.41         | 0.002792 | 0.1120131   |
| NM_008471                                          | Krt19       | keratin 19                                 | 1.41         | 0.020774 | 0.2154201   |

**B**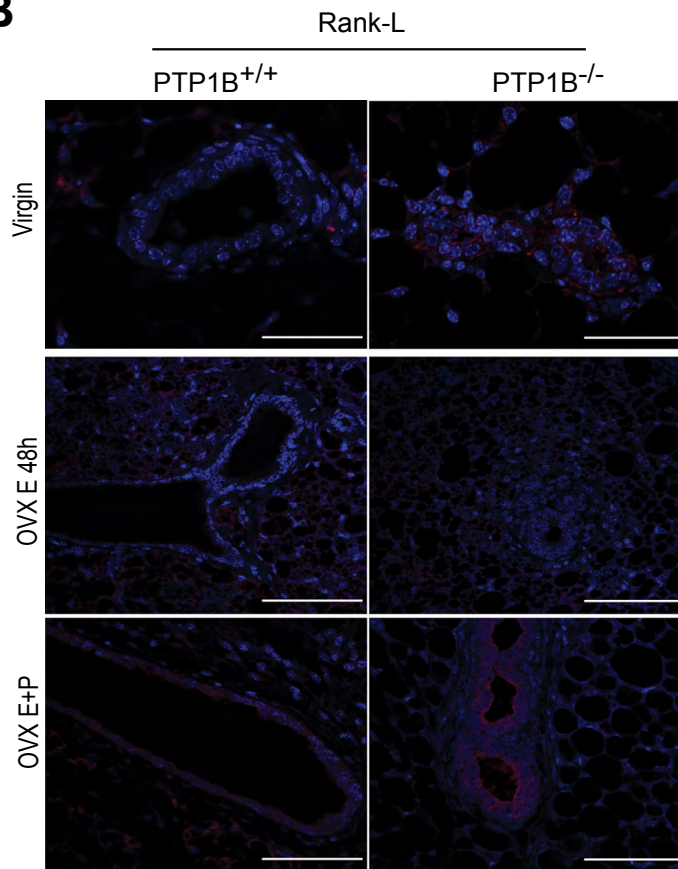

**Fig. S2. Absence of PTP1B increases expression of cell cycle genes and of the PR target Rankl.** (A) Upregulated cell cycle genes (top) and upregulated estrogen-responsive genes (bottom) in nulliparous *Ptp1b*<sup>-/-</sup> glands compared with wild-type littermates. (B) Representative images of mammary gland sections stained for Rankl. Scale bars: 50  $\mu$ m.

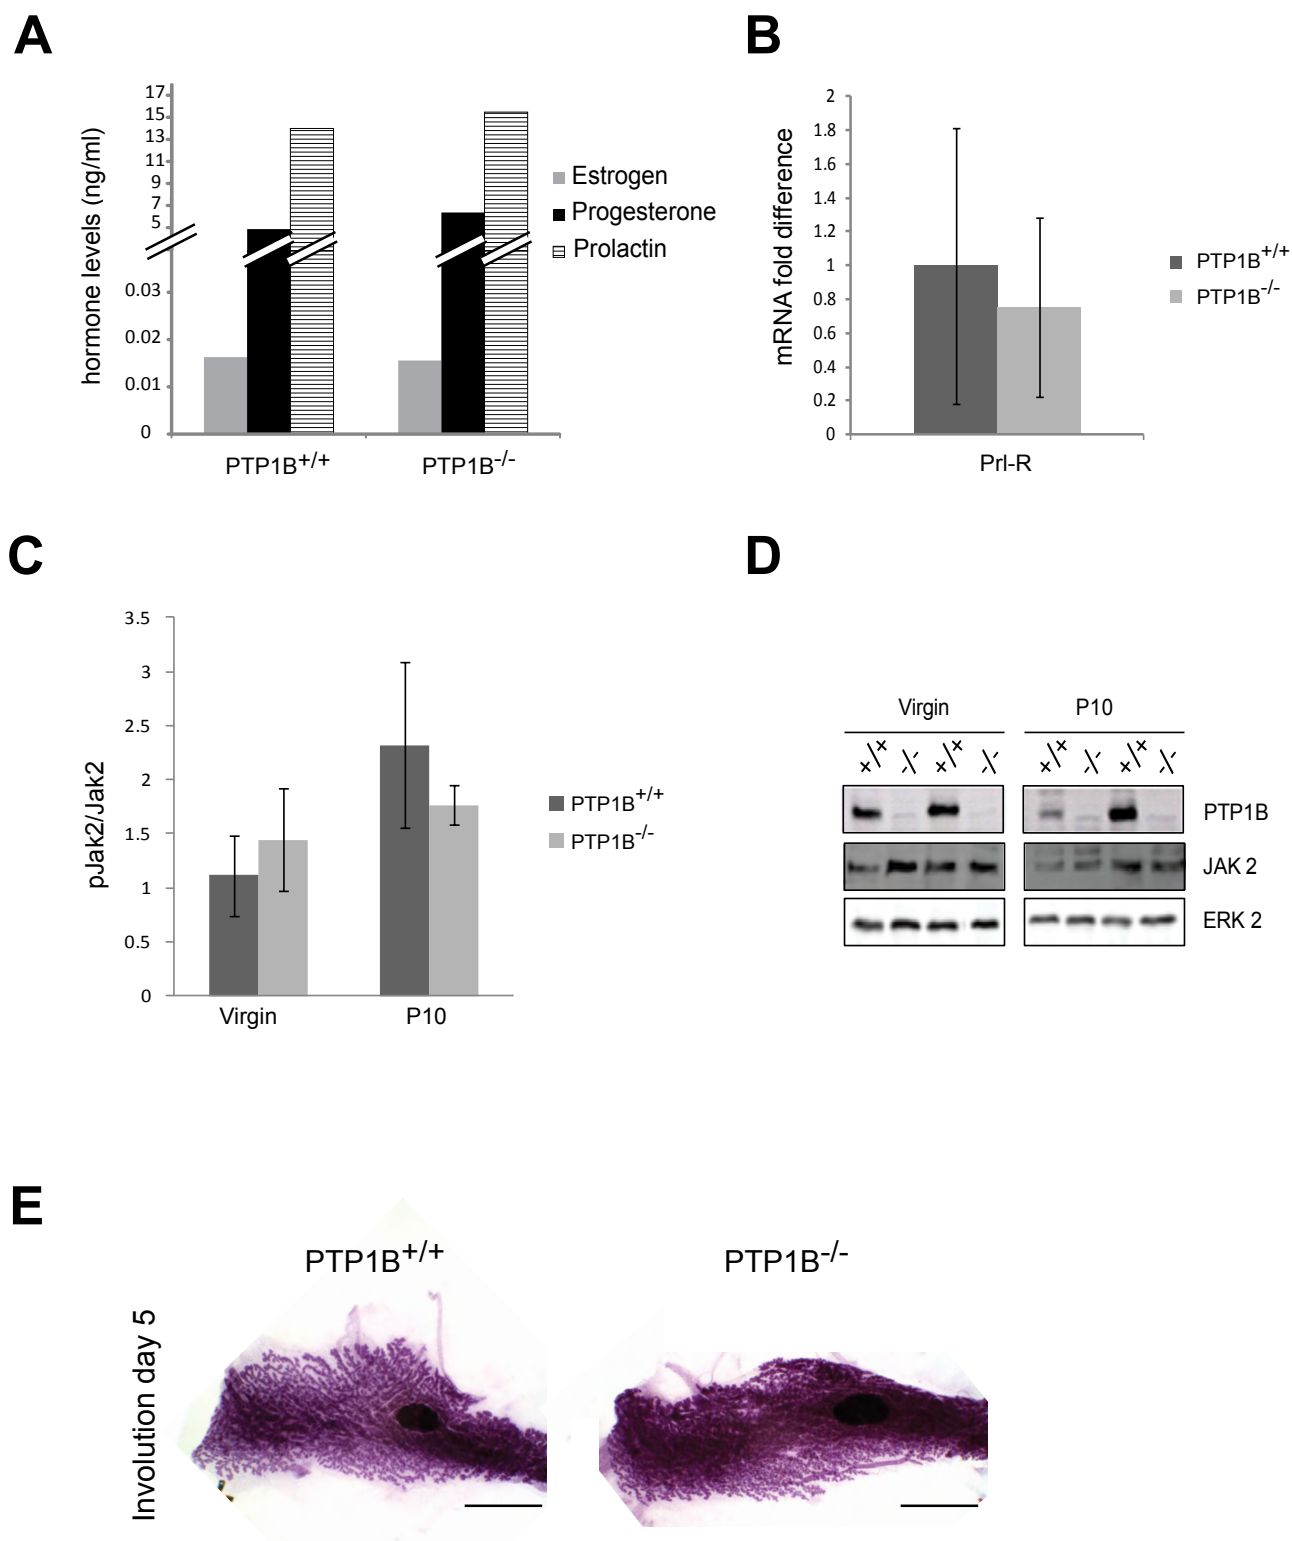

**Fig. S3. Absence of PTP1B does not affect plasma levels of pregnancy hormones in mice at estrus and does not alter mammary gland involution.** (A) Plasma levels of estrogen, progesterone and prolactin in nulliparous mice at estrus as assessed by ELISA (the plasma of three mice per group was pooled and analyzed using estradiol and progesterone ELISA from DRG Diagnostic and prolactin ELISA from Abcam). (B) Fold changes in Prl-R mRNA as assessed by quantitative real-time PCR. Values represent mean  $\pm$  s.e.m. ( $n=3$ ). (C) The ratios of pJak2/Jak2 in virgin and pregnant (day 10) mice. pJak2 levels were assessed using an ELISA assay (Tyr1007/1008, Invitrogen) and normalized to total Jak2 levels assessed by immunoblotting. Values represent mean  $\pm$  s.e.m. ( $n=3$ ,  $*P<0.05$  by Student's  $t$ -test). (D) Immunoblots of lysates from glands in virgin and pregnancy day 10 mice (Jak2 antibody, Cell Signaling). (E) Representative images of whole-mounts of *Ptp1b*<sup>-/-</sup> and *Ptp1b*<sup>+/+</sup> mammary glands at involution day 5. Scale bars: 5 mm.

**Table S1. Top 19 affected Gene Ontology terms in *Ptp1b*<sup>-/-</sup> versus *Ptp1b*<sup>+/+</sup> mammary glands**

| Gene Ontology term upregulated in <i>Ptp1b</i> <sup>-/-</sup>   | Cluster frequency       | Corrected <i>P</i> -value |
|-----------------------------------------------------------------|-------------------------|---------------------------|
| Cellular process                                                | 244 of 359 genes, 68.0% | 4.06E-26                  |
| Cell cycle                                                      | 50 of 359 genes, 13.9%  | 3.85E-16                  |
| Cell division                                                   | 30 of 359 genes, 8.4%   | 2.96E-15                  |
| Cell cycle phase                                                | 35 of 359 genes, 9.7%   | 4.94E-15                  |
| Cell cycle process                                              | 40 of 359 genes, 11.1%  | 7.08E-15                  |
| M phase                                                         | 30 of 359 genes, 8.4%   | 2.50E-14                  |
| Biological regulation                                           | 168 of 359 genes, 46.8% | 7.51E-14                  |
| M phase of mitotic cell cycle                                   | 24 of 359 genes, 6.7%   | 1.55E-12                  |
| Cellular component organization or biogenesis                   | 85 of 359 genes, 23.7%  | 2.32E-12                  |
| Cellular component organization                                 | 83 of 359 genes, 23.1%  | 2.34E-12                  |
| Nuclear division                                                | 23 of 359 genes, 6.4%   | 6.14E-12                  |
| Mitosis                                                         | 23 of 359 genes, 6.4%   | 6.14E-12                  |
| Mitotic cell cycle                                              | 31 of 359 genes, 8.6%   | 6.45E-12                  |
| Organelle fission                                               | 23 of 359 genes, 6.4%   | 1.98E-11                  |
| Organelle organization                                          | 54 of 359 genes, 15.0%  | 3.02E-11                  |
| Regulation of biological process                                | 157 of 359 genes, 43.7% | 3.21E-11                  |
| Cellular component organization at cellular level               | 68 of 359 genes, 18.9%  | 4.63E-11                  |
| Cellular component organization or biogenesis at cellular level | 69 of 359 genes, 19.2%  | 1.29E-10                  |
| Metabolic process                                               | 159 of 359 genes, 44.3% | 9.95E-10                  |

| Gene Ontology term downregulated in <i>Ptp1b</i> <sup>-/-</sup> | Cluster frequency     | Corrected <i>P</i> -value |
|-----------------------------------------------------------------|-----------------------|---------------------------|
| Alcohol metabolic process                                       | 10 of 62 genes, 16.1% | 3.16E-06                  |
| Small molecule metabolic process                                | 19 of 62 genes, 30.6% | 3.18E-06                  |
| Glucose metabolic process                                       | 7 of 62 genes, 11.3%  | 5.47E-06                  |
| Carbohydrate metabolic process                                  | 10 of 62 genes, 16.1% | 1.38E-05                  |
| Hexose metabolic process                                        | 7 of 62 genes, 11.3%  | 1.88E-05                  |
| Cellular carbohydrate metabolic process                         | 9 of 62 genes, 14.5%  | 2.54E-05                  |
| Monosaccharide metabolic process                                | 7 of 62 genes, 11.3%  | 6.20E-05                  |
| Cellular process                                                | 44 of 62 genes, 71.0% | 0.00011                   |
| Carbohydrate transport                                          | 5 of 62 genes, 8.1%   | 0.00059                   |
| Skeletal muscle contraction                                     | 3 of 62 genes, 4.8%   | 0.00104                   |
| Localization                                                    | 20 of 62 genes, 32.3% | 0.00111                   |
| Transport                                                       | 18 of 62 genes, 29.0% | 0.00122                   |
| Striated muscle contraction                                     | 4 of 62 genes, 6.5%   | 0.0013                    |
| Establishment of localization                                   | 18 of 62 genes, 29.0% | 0.00157                   |
| Biological regulation                                           | 33 of 62 genes, 53.2% | 0.00245                   |
| Regulation of striated muscle contraction                       | 3 of 62 genes, 4.8%   | 0.0026                    |
| Metabolic process                                               | 33 of 62 genes, 53.2% | 0.0038                    |
| Protein homooligomerization                                     | 5 of 62 genes, 8.1%   | 0.00387                   |

List of Gene Ontology terms upregulated and downregulated in *Ptp1b*<sup>-/-</sup> compared with *Ptp1b*<sup>+/+</sup> glands from nulliparous mice at estrus. Terms were obtained from the Process Ontology of gene\_association.mgi (*P*<0.01).
